# Supplementary material for: Interplay between transition-metal K-edge XMCD, slight structural distortions and magnetism in a series of trimetallic (CoxNi(1−x))4[Fe(CN)6]3/8 Prussian blue analogues
Source: Royal Society of Chemistry journal article supplement (doi:10.1039/d3cp04749k), 2024-01-01

## Supplementary Material for

### Interplays between Transition-Metal K-edge XMCD, slight structural distortion and magnetism in a series of trimetallic $\text{Co}_x\text{Ni}_{(1-x)}\text{Fe}$ Prussian Blue Analogs.

Adama N'Diaye,<sup>b</sup> Amélie Bordage,<sup>a</sup> Lucie Nataf,<sup>b</sup> François Baudalet,<sup>b</sup> Eric Rivière<sup>a</sup> and Anne Bleuzen<sup>\*a</sup>

<sup>a</sup> Institut de Chimie Moléculaire et des Matériaux d'Orsay, Université Paris-Saclay, CNRS, 91405 Orsay, France

<sup>b</sup> Synchrotron SOLEIL, L'Orme des Merisiers, St Aubin, BP 48, 91192 Gif sur Yvette, France.

#### Electronic Supplementary Information

S1. X-ray diffraction patterns, cell parameters and EDS analyses of **NiFe**, **Ni<sub>75</sub>Co<sub>25</sub>Fe**, **Ni<sub>50</sub>Co<sub>50</sub>Fe** and **Ni<sub>25</sub>Co<sub>75</sub>Fe**.

S2. Field Cooled (FC) and Zero Field Cooled (ZFC) magnetization curves for **NiFe**, **Ni<sub>75</sub>Co<sub>25</sub>Fe**, **Ni<sub>50</sub>Co<sub>50</sub>Fe** and **Ni<sub>25</sub>Co<sub>75</sub>Fe**.

S3. Temperature dependence of the inverse of the magnetic molar susceptibilities for **NiFe**, **Ni<sub>75</sub>Co<sub>25</sub>Fe**, **Ni<sub>50</sub>Co<sub>50</sub>Fe** and **Ni<sub>25</sub>Co<sub>75</sub>Fe**.

S4. Variation of the lattice constant value with the Co% along the **Co<sub>x</sub>Ni<sub>(1-x)</sub>Fe** series.

S5. Variation of the Curie-Weiss temperature ( $\theta$ ) with x (the mole fraction of Co ions at the A site).

S6. X-ray diffraction pattern of **NiCr<sub>0.50</sub>Fe<sub>0.50</sub>**.

S7. Field Cooled (FC) and Zero Field Cooled (ZFC) magnetization curves for **NiCr<sub>0.50</sub>Fe<sub>0.50</sub>**.

S8. Magnetic field dependence of the magnetization at 4 K of **NiCr<sub>0.50</sub>Fe<sub>0.50</sub>**.

S1. X-ray diffraction patterns, cell parameters and EDS analyses of **CoFe**, **Co<sub>0.7</sub>Ni<sub>0.3</sub>Fe**, **Co<sub>0.56</sub>Ni<sub>0.44</sub>Fe**, **Co<sub>0.35</sub>Ni<sub>0.65</sub>Fe** and **NiFe**.

X-ray diffraction patterns were recorded using a Phillips PAN X-Pert PRO MPD X-ray diffractometer (Cu K $\alpha$ <sub>1</sub>;  $\lambda = 1.5418 \text{ \AA}$ ). An aluminum sample holder was used.

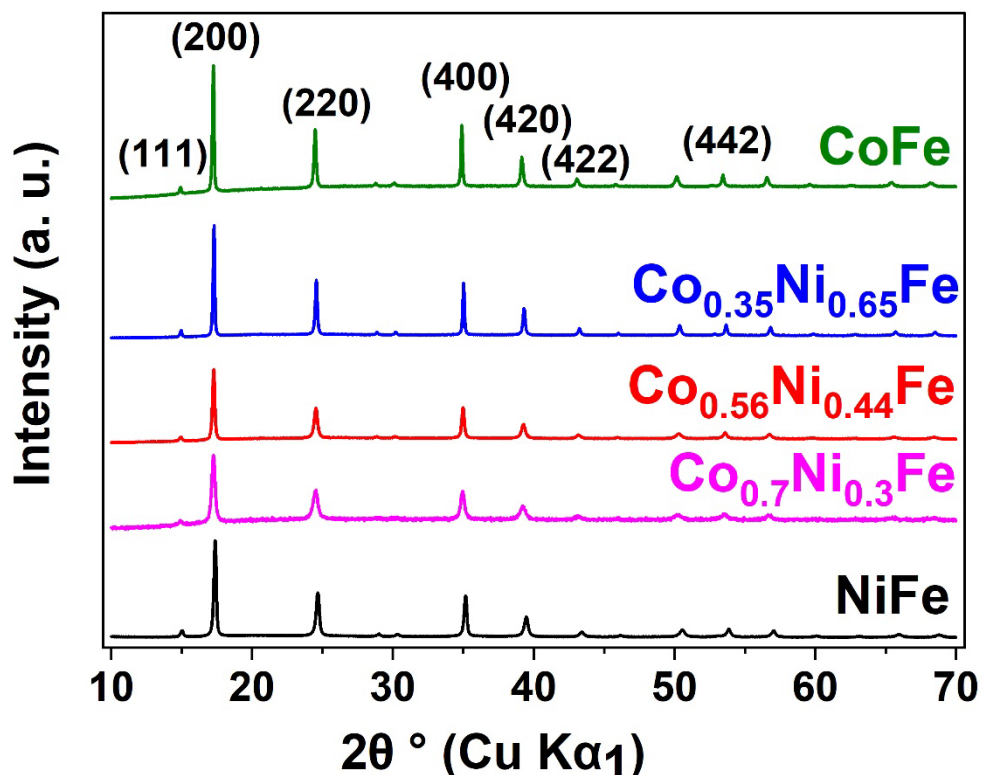

All X-ray diffraction patterns exhibit the peaks of the well-known fcc structure of the PBAs. The cell parameters for the four PBAs are :

|                                               |                                       |
|-----------------------------------------------|---------------------------------------|
| <b>NiFe</b> :                                 | $a = 10.204 \pm 0.001 \text{ \AA}$    |
| <b>Co<sub>0.35</sub>Ni<sub>0.65</sub>Fe</b> : | $a = 10.25685 \pm 0.0004 \text{ \AA}$ |
| <b>Co<sub>0.56</sub>Ni<sub>0.44</sub>Fe</b> : | $a = 10.2607 \pm 0.0004 \text{ \AA}$  |
| <b>Co<sub>0.7</sub>Ni<sub>0.3</sub>Fe</b> :   | $a = 10.2701 \pm 0.0004 \text{ \AA}$  |
| <b>CoFe</b> :                                 | $a = 10.286 \pm 0.001 \text{ \AA}$    |

The EDS analyses were used to determine the chemical formula of the trimetallic compounds. The results are given in the following table. The results for **NiFe** (Ni<sub>4</sub>[Fe(CN)<sub>6</sub>]<sub>2.7</sub>•17H<sub>2</sub>O) and **CoFe** (Co<sub>4</sub>[Fe(CN)<sub>6</sub>]<sub>2.7</sub>•17H<sub>2</sub>O) were given in ref. 37.

| Sample                    | Co <sub>0.35</sub> Ni <sub>0.65</sub> Fe                                                                        | Co <sub>0.56</sub> Ni <sub>0.44</sub> Fe                                                                        | Co <sub>0.7</sub> Ni <sub>0.3</sub> Fe                                                                          |
|---------------------------|-----------------------------------------------------------------------------------------------------------------|-----------------------------------------------------------------------------------------------------------------|-----------------------------------------------------------------------------------------------------------------|
| Co:Ni:Fe Atomic%          | 21.67 : 39.57 : 38.76                                                                                           | 33.53 : 26.88 : 39.59                                                                                           | 39.31 : 14.47 : 46.22                                                                                           |
| Proposed chemical formula | (Ni <sub>0.65</sub> Co <sub>0.35</sub> ) <sub>4</sub> [Fe(CN) <sub>6</sub> ] <sub>2.5</sub> •17H <sub>2</sub> O | (Ni <sub>0.44</sub> Co <sub>0.56</sub> ) <sub>4</sub> [Fe(CN) <sub>6</sub> ] <sub>2.6</sub> •17H <sub>2</sub> O | (Ni <sub>0.3</sub> Co <sub>0.70</sub> ) <sub>4</sub> [Fe(CN) <sub>6</sub> ] <sub>2.73</sub> •17H <sub>2</sub> O |

S2. Field Cooled (FC) and Zero Field Cooled (ZFC) magnetization curves for **CoFe**, **Co<sub>0.7</sub>Ni<sub>0.3</sub>Fe**, **Co<sub>0.56</sub>Ni<sub>0.44</sub>Fe**, **Co<sub>0.35</sub>Ni<sub>0.65</sub>Fe** and **NiFe**.

The inset of each figure presents the derivative of the magnetization versus temperature, used for the determination of the magnetic ordering temperature  $T_{C/N}$  (which is the minimum of each curve).

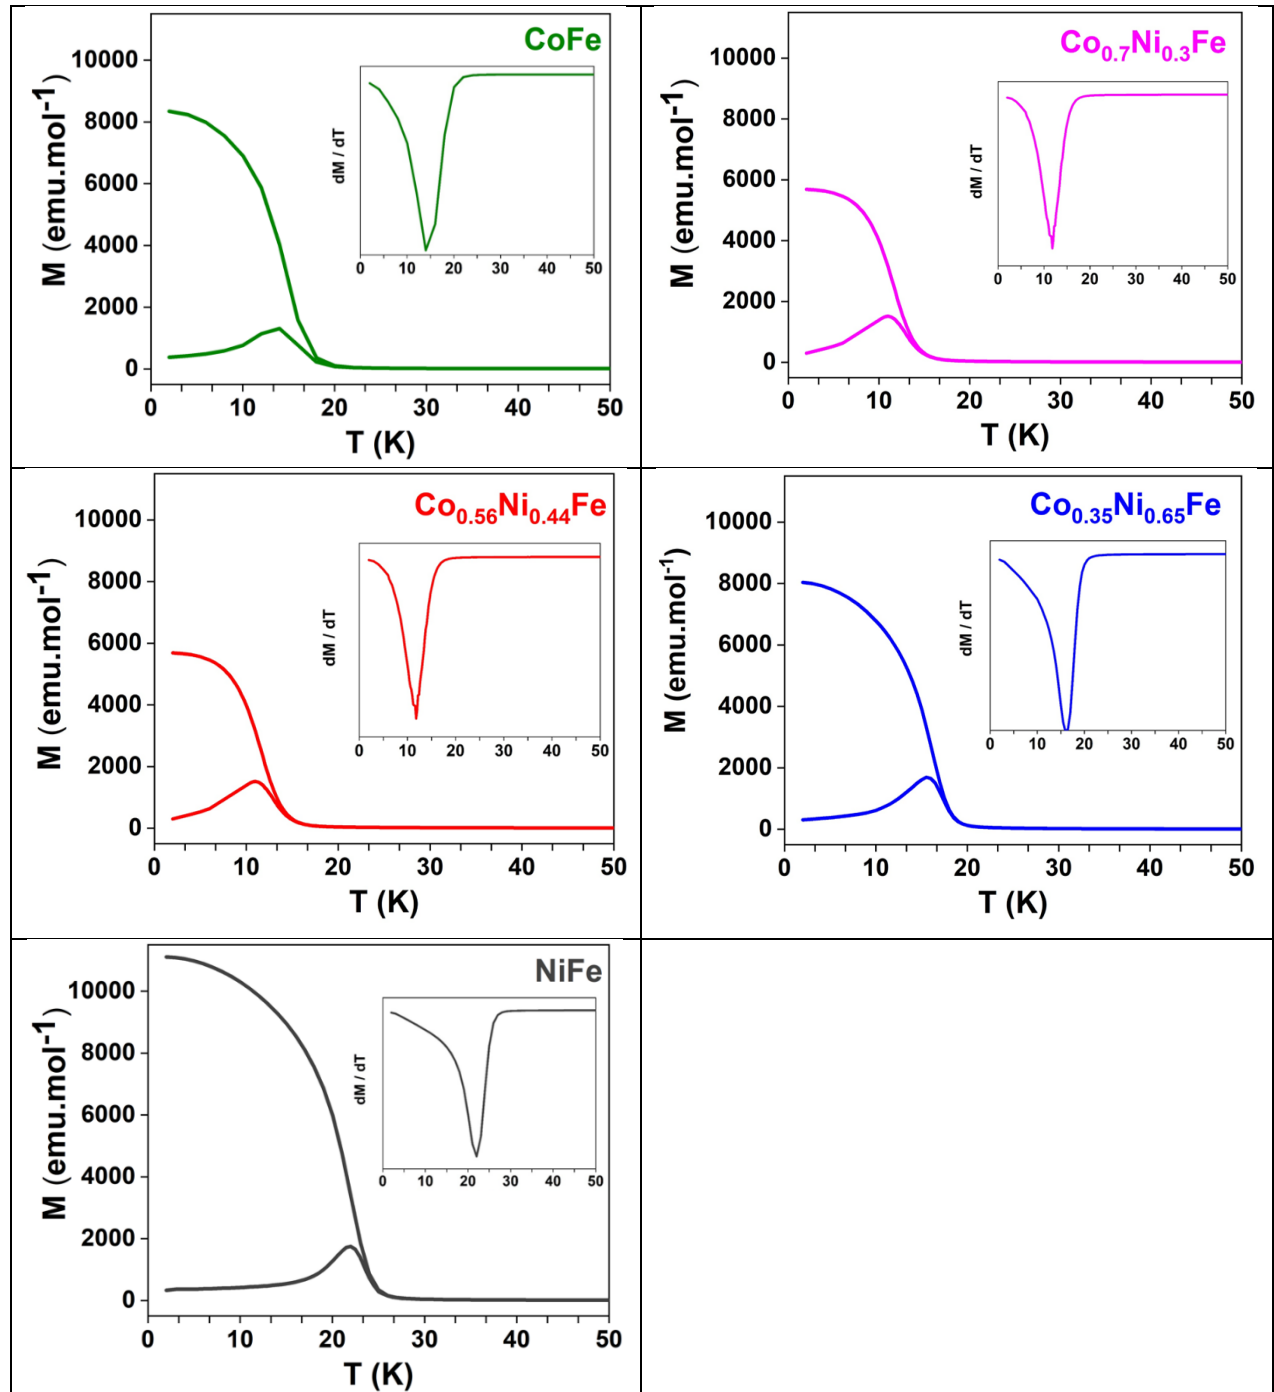

S3. Temperature dependence of the inverse of the magnetic molar susceptibilities for **CoFe**, **Co<sub>0.7</sub>Ni<sub>0.3</sub>Fe**, **Co<sub>0.56</sub>Ni<sub>0.44</sub>Fe**, **Co<sub>0.35</sub>Ni<sub>0.65</sub>Fe** and **NiFe**.

The curves were reproduced on the linear part in the appropriate high temperature range by a Curie-Weiss law :

$$\chi = \frac{C_{PBA}}{T - \theta}$$

where  $\chi$  is the molar magnetic susceptibility,  $C_{PBA}$  the Curie constant, T the temperature and  $\theta$  the Weiss constant.

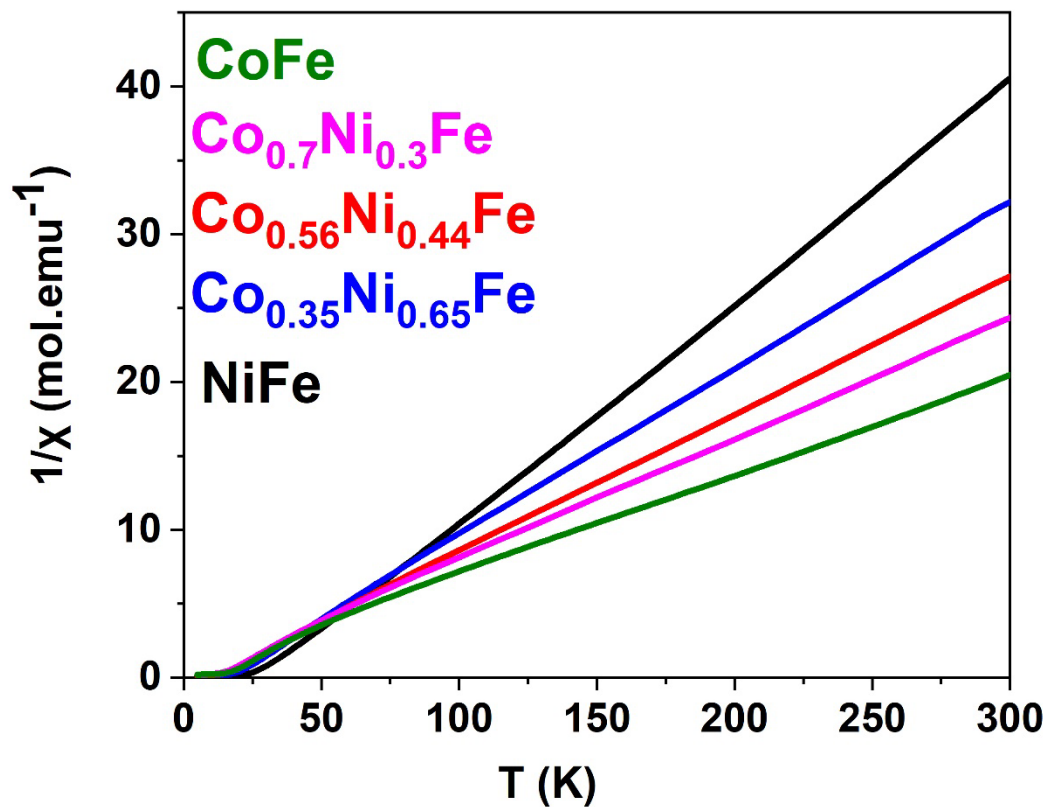

S4. Variation of the lattice constant value with the Co% along the  $\text{Co}_x\text{Ni}_{(1-x)}\text{Fe}$  series.

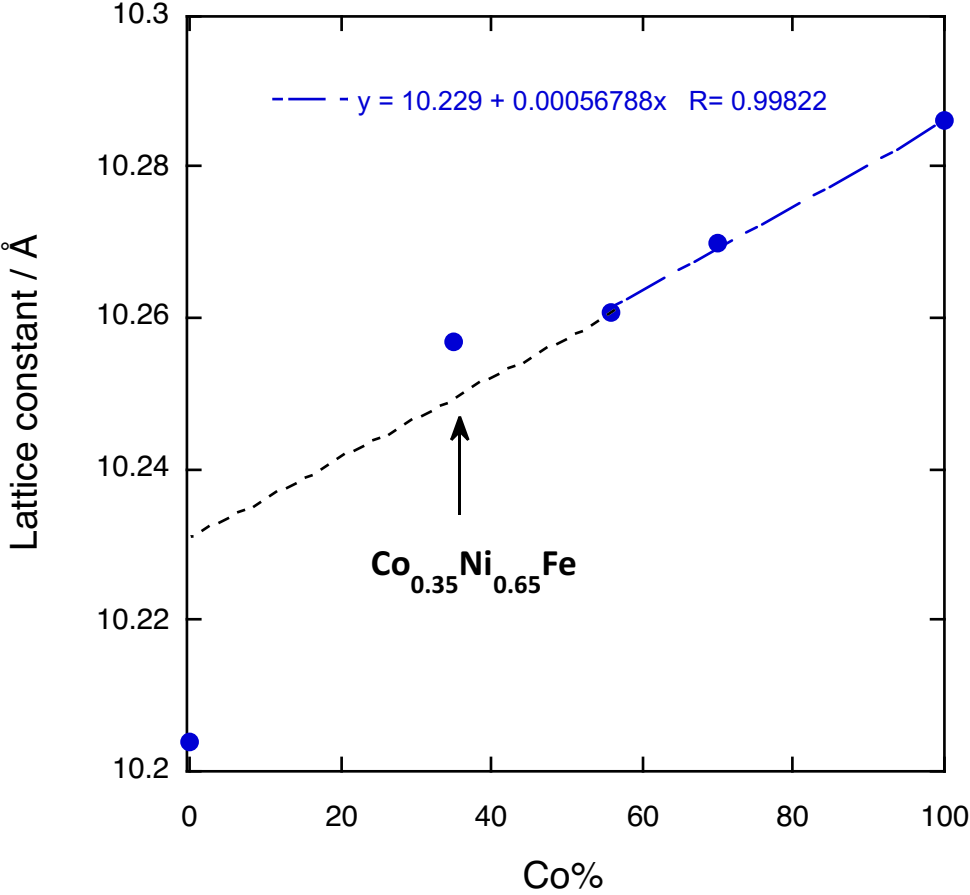

S5. Variation of the Curie-Weiss temperature ( $\theta$ ) with  $x$  (the mole fraction of Co ions at the A site).

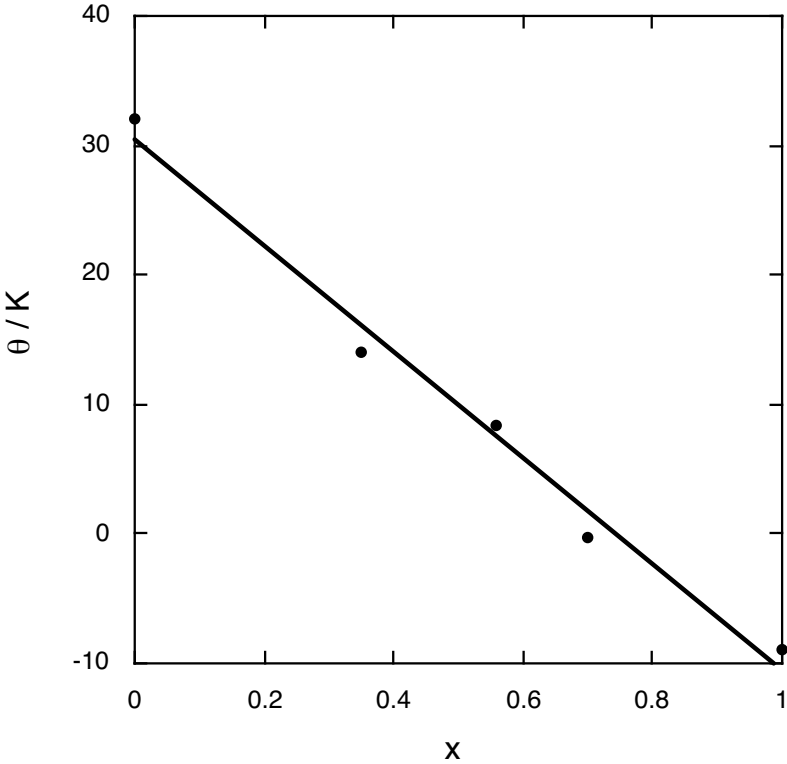

S6. X-ray diffraction pattern of  $\text{NiCr}_{0.50}\text{Fe}_{0.50}$ .

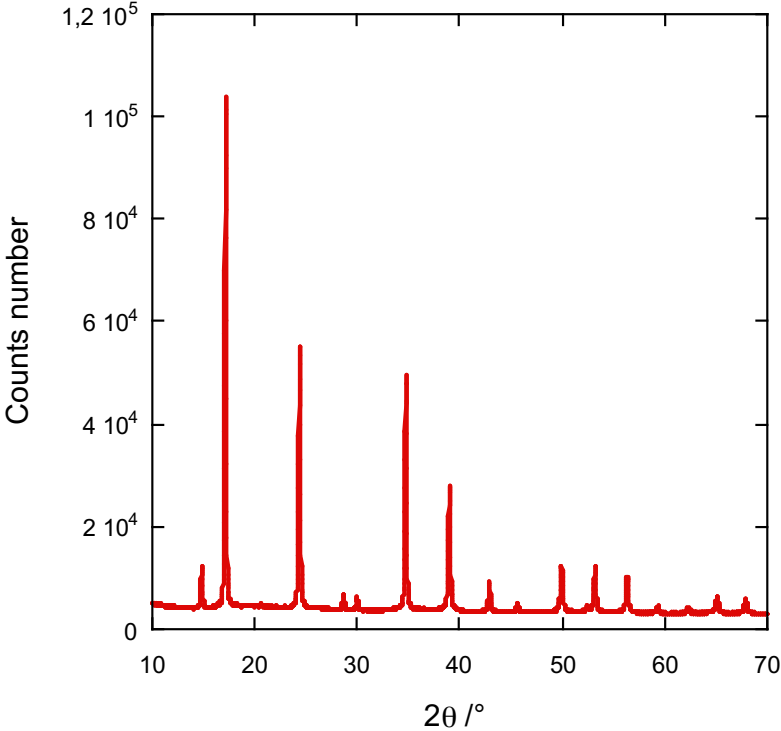

S7. Field Cooled (FC) and Zero Field Cooled (ZFC) magnetization curves for  $\text{NiCr}_{0.50}\text{Fe}_{0.50}$ .

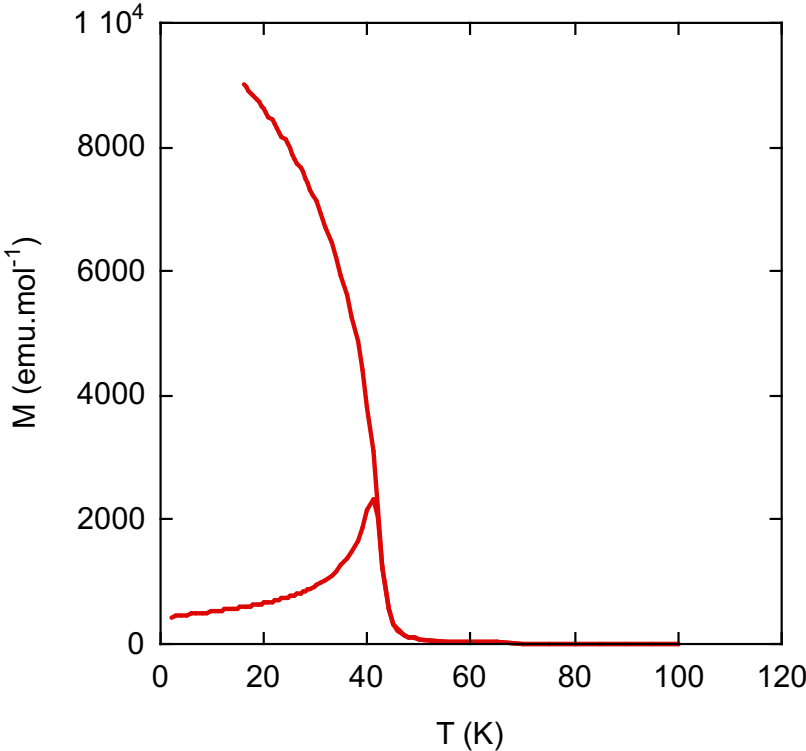



S8. Magnetic field dependence of the magnetization at 4 K of  $\text{NiCr}_{0.50}\text{Fe}_{0.50}$ .

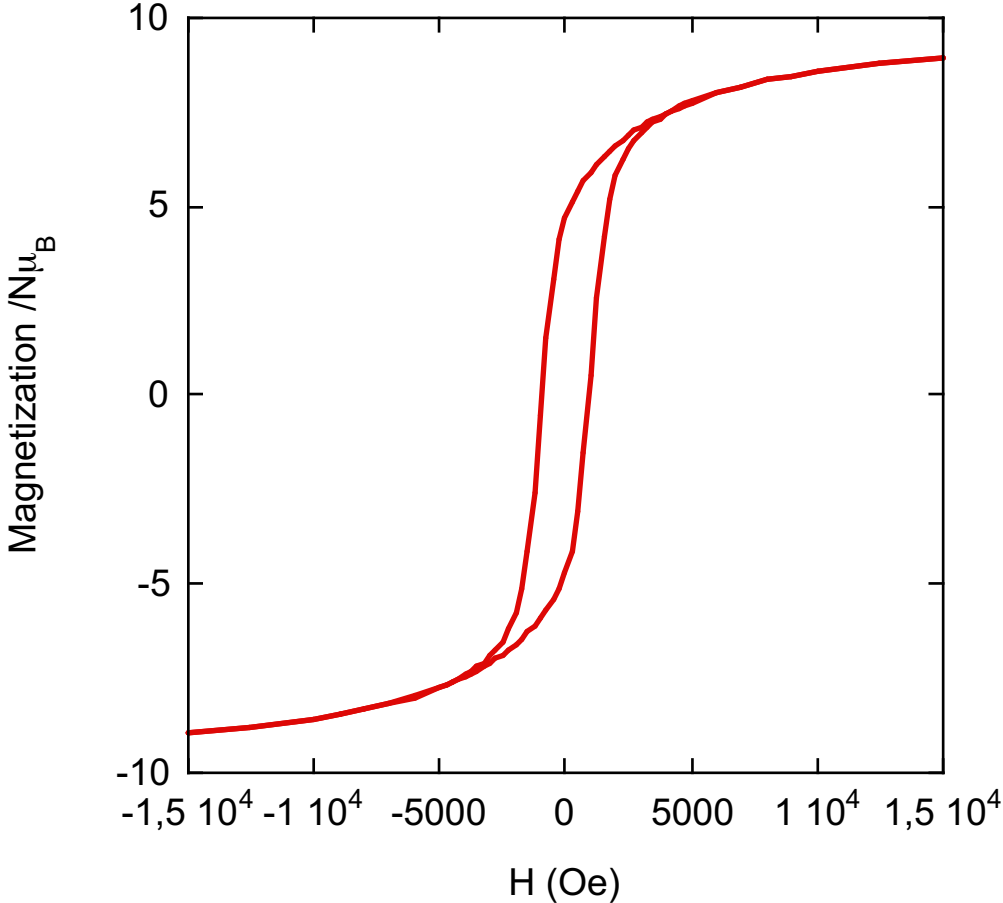

Supplement: d3cp04749k1.pdf [file d3cp04749k1.pdf]
